# Supplementary material
Source: publisher figshare collection journal article supplement (https://acs.figshare.com/ndownloader/files/13603220)
Supplement: Supplementary file 1 [file 13603220]

# Supporting Information

## Understanding Water Adsorption and the Impact on CO<sub>2</sub> Capture in Chemically Stable Covalent Organic Frameworks

*Yuxin Ge,<sup>a</sup> Hao Zhou,<sup>a</sup> Yujin Ji,<sup>b</sup> Lifeng Ding,<sup>\*a</sup> Yuanyuan Cheng,<sup>c</sup> Ruiyao Wang,<sup>a</sup> Siyuan Yang,<sup>a</sup> Yufeng Liu,<sup>a</sup> Xiaoyu Wu,<sup>a</sup> and Youyong Li,<sup>\*b</sup>*

*a Department of Chemistry, Xi'an JiaoTong-Liverpool University, 111 Ren'ai Road, Suzhou Dushu Lake Higher Education Town, Jiangsu Province, 215123, China*

*b Institute of Functional Nano & Soft Materials (FUNSOM), Jiangsu Key Laboratory for Carbon-Based Functional Materials & Devices, Soochow University, Suzhou, Jiangsu, 215213, China*

*c School of Environmental Science & Engineering, Suzhou University of Science & Technology, Suzhou, 215009, China*

*Yuxin Ge and Hao Zhou contributed equally to this work*

*Corresponding authors: Lifeng Ding (Lifeng.Ding@xjtlu.edu.cn); Youyong Li (yyli@suda.edu.cn)*

| <b>Section</b> |                                                                                                                                                         | <b>Page No.</b> |
|----------------|---------------------------------------------------------------------------------------------------------------------------------------------------------|-----------------|
| <b>S-1</b>     | <b>Summary of characteristics of the COFs</b>                                                                                                           | <b>3</b>        |
| <b>S-2</b>     | <b>Structure-Property correlations</b>                                                                                                                  | <b>6</b>        |
| <b>S-3</b>     | <b>Model clusters and atomic partial charges for TpPa-NO<sub>2</sub></b>                                                                                | <b>8</b>        |
| <b>S-4</b>     | <b>Simulated water adsorption snapshots in the COFs</b>                                                                                                 | <b>9</b>        |
| <b>S-5</b>     | <b>Simulated water and CO<sub>2</sub> adsorption density plots in the COFs.</b>                                                                         | <b>15</b>       |
| <b>S-6</b>     | <b>Pore size distributions of the COFs</b>                                                                                                              | <b>19</b>       |
| <b>S-7</b>     | <b>Radial distribution functions (RDF) of the oxygen-oxygen distance between oxygen atoms of the water molecules and the COF framework oxygen atoms</b> | <b>25</b>       |
| <b>S-8</b>     | <b>Force field parameters used in the GCMC simulations</b>                                                                                              | <b>26</b>       |

### Section S-1: Summary of characteristics of the COFs

Table S1. Summary of characteristics of the COFs studied in this work

| COFs            | $V_p$ , cm <sup>3</sup> g <sup>-1</sup> |      | BET                            | Geometric surface area         | Pore Diameter, Å     |            |
|-----------------|-----------------------------------------|------|--------------------------------|--------------------------------|----------------------|------------|
|                 | Lit                                     | Sim  | m <sup>2</sup> g <sup>-1</sup> | m <sup>2</sup> g <sup>-1</sup> | Lit                  | Sim        |
| <b>COF-42</b>   | 0.31 <sup>1</sup>                       | 1.07 | 710 <sup>5</sup>               | 2644                           | 23.0 <sup>5</sup>    | 16.47      |
| <b>COF-43</b>   | 0.36 <sup>5</sup>                       | 2.07 | 620 <sup>5</sup>               | 2571                           | 38.0 <sup>5</sup>    | 31.71      |
| <b>COF-300</b>  | 0.72 <sup>6</sup>                       | 1.19 | 1360 <sup>6</sup>              | 3453                           | 7.2 <sup>6</sup>     | 8.73       |
| <b>COF-320</b>  | 0.81 <sup>2</sup>                       | 0.60 | -                              | 1694                           | 8.0 <sup>2</sup>     | 7.71       |
| <b>COF-LZU1</b> | 0.54 <sup>7</sup>                       | 1.01 | 410 <sup>7</sup>               | 2129                           | 12.0 <sup>7</sup>    | 15.15      |
| <b>TpPa-1</b>   | -                                       | 0.81 | 535 <sup>8</sup>               | 1639                           | 12.5 <sup>8</sup>    | 15.27      |
| <b>TpPa-2</b>   | -                                       | 0.63 | 339 <sup>8</sup>               | 1569                           | 13.5 <sup>8</sup>    | 12.87      |
| <b>TpPa-F4</b>  | -                                       | 0.51 | 438 <sup>1</sup>               | 1115                           | 17.0 <sup>1</sup>    | 14.55      |
| <b>TpPa-NO2</b> | -                                       | 0.54 | 129 <sup>1</sup>               | 1254                           | 16.0 <sup>1</sup>    |            |
| <b>NPN-1</b>    | 0.48 <sup>9</sup>                       | 0.42 | -                              | 861                            | 7.3×3.3 <sup>9</sup> | 3.51, 5.01 |
| <b>NPN-2</b>    | 0.54 <sup>9</sup>                       | 0.46 | -                              | 1104                           | 7.8×3.4 <sup>9</sup> | 3.75, 5.01 |
| <b>NPN-3</b>    | 0.46 <sup>9</sup>                       | 0.34 | -                              | 915                            | 5.2×5.2 <sup>9</sup> | 4.35, 5.25 |
| <b>TpBD</b>     | -                                       | 1.12 | 537 <sup>10</sup>              | 1710                           | 17.2 <sup>10</sup>   | 22.11      |
| <b>CTF-1</b>    | 0.40 <sup>11</sup>                      | 0.36 | 791 <sup>11</sup>              | 905                            | 12.0 <sup>11</sup>   | 8.07       |
| <b>DAAQ-TFP</b> | -                                       | 1.10 | 1280 <sup>12</sup>             | 1737                           | 23.0 <sup>12</sup>   | 21.63      |

**Table S2. Summary of adsorption heats, inflection points and water uptake in  $p/p_0 = 0.1$ , 0.3 and 0.9 of the COF at 298 K.**

| COFs                       | Adsorption heat      | Inflection point | Water uptake, cm <sup>3</sup> g <sup>-1</sup> |               |               |
|----------------------------|----------------------|------------------|-----------------------------------------------|---------------|---------------|
|                            | kJ mol <sup>-1</sup> | RH               | $p/p_0 = 0.1$                                 | $p/p_0 = 0.3$ | $p/p_0 = 0.9$ |
| <b>COF-42</b>              | 55.89                | 0.71             | 326                                           | 394           | 1315          |
| <b>COF-43</b>              | 65.89                | 0.78             | 143                                           | 238           | 2620          |
| <b>COF-300</b>             | 13.57                | 0.52             | 0.049                                         | 0.149         | 0.821         |
| <b>COF-320</b>             | 29.69                | 0.52             | 0.245                                         | 0.773         | 17.267        |
| <b>COF-LZU1</b>            | 19.79                | 0.45             | 0.050                                         | 0.164         | 0.537         |
| <b>TpPa-1</b>              | 48.17                | 0.26             | 65.0                                          | 894           | 962           |
| <b>TpPa-2</b>              | 58.60                | 0.26             | 163                                           | 699           | 747           |
| <b>TpPa-F4</b>             | 35.11                | 0.58             | 0.820                                         | 2.474         | 75.3          |
| <b>TpPa-NO<sub>2</sub></b> | 60.47                | 0.13             | 410                                           | 612           | 653           |
| <b>NPN-1</b>               | 24.10                | 0.45             | 1.579                                         | 207           | 344           |
| <b>NPN-2</b>               | 27.73                | 0.19             | 18.532                                        | 393           | 435           |
| <b>NPN-3</b>               | 31.48                | 0.26             | 20.286                                        | 282           | 363           |
| <b>TpBD</b>                | 58.12                | 0.65             | 171                                           | 196           | 1347          |
| <b>CTF-1</b>               | 6.44                 | 0.45             | 0.005                                         | 0.015         | 28.871        |
| <b>DAAQ-TFP</b>            | 38.86                | 0.22             | 226                                           | 1253          | 1348          |

**Table S3. Summary of the adsorption heats of 6 water models at low coverage in TpPa-1 and TpPa-2.**

| COFs            | TpPa-1                                     | TpPa-2                                     |
|-----------------|--------------------------------------------|--------------------------------------------|
|                 | Heat of adsorption (kJ mol <sup>-1</sup> ) | Heat of adsorption (kJ mol <sup>-1</sup> ) |
| <b>SPC</b>      | 49.00                                      | 59.30                                      |
| <b>SPC/E</b>    | 48.17                                      | 58.60                                      |
| <b>TIP4P</b>    | 52.77                                      | 61.03                                      |
| <b>TIP4P_EW</b> | 52.79                                      | 64.46                                      |
| <b>TIP5P</b>    | 39.13                                      | 53.49                                      |
| <b>TIP5P_EW</b> | 39.68                                      | 52.00                                      |

## Section S-2: Structure-Property correlations

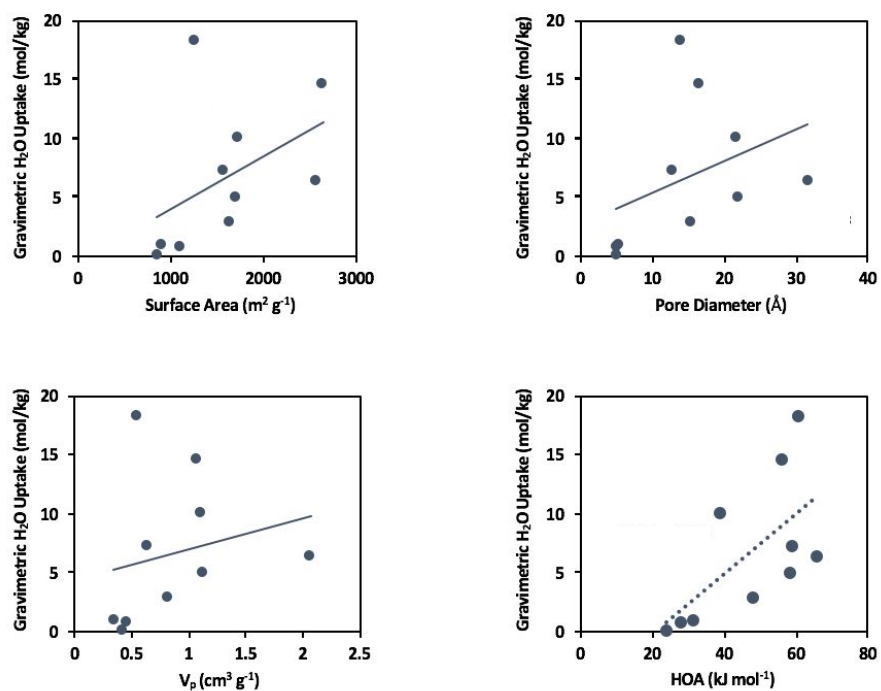

**Figure S1.** Structure-property correlations between geometric water uptake and the surface area, pore diameter, porosity, heat of adsorption (HOA) of the COFs at RH = 0.1 and 298 K.

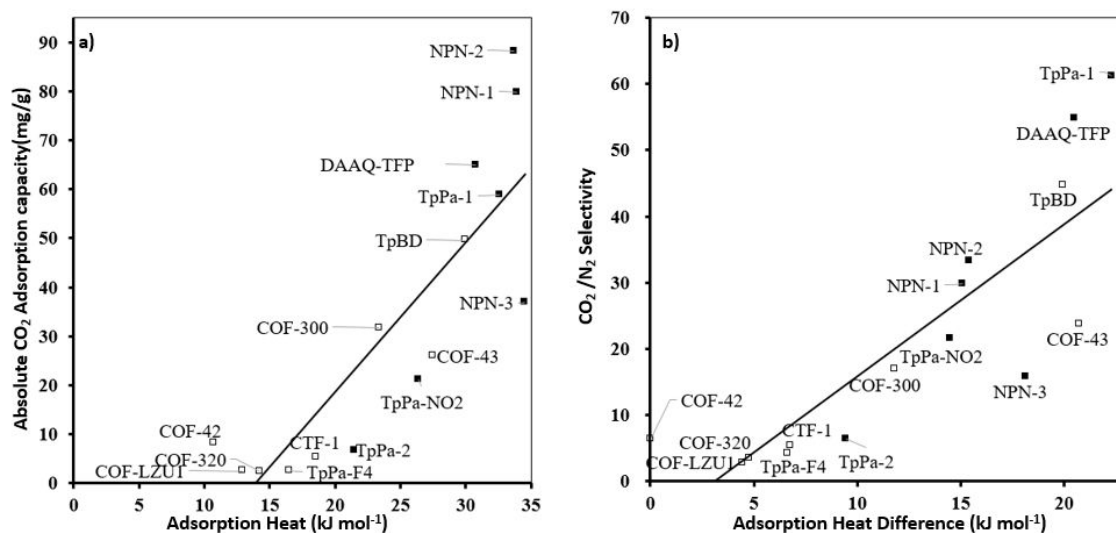

**Figure S2.** (a) Correlation between absolute CO<sub>2</sub> uptake and its isosteric heat of adsorption in the COFs at 1 bar (partial pressure of CO<sub>2</sub> is 0.15 bar, dry condition). (b) Correlation between CO<sub>2</sub>/N<sub>2</sub> selectivity and the adsorption heat difference of CO<sub>2</sub>/N<sub>2</sub> in the COFs at 1 bar (partial pressure of CO<sub>2</sub> is 0.15 bar, dry condition).

### Section S-3: Model Clusters and atomic partial charges for TpPa-NO<sub>2</sub>

**TpPa-NO<sub>2</sub>**

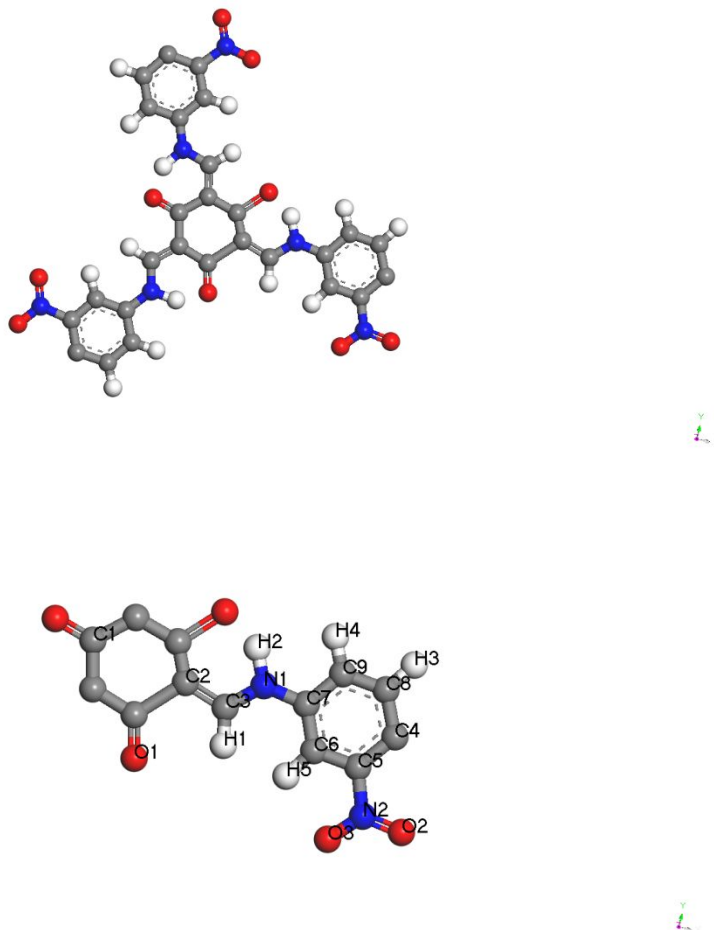

**Figure S3.** Model cluster used for calculating the partial charges for each atom of TpPa-NO<sub>2</sub>.

**Table S4.** Atomic partial charges calculated using ChelpG method.

| Atomic Types | C1    | C2     | C3    | C4    | C5     | C6     | C7    | C8     | C9     | H1    |
|--------------|-------|--------|-------|-------|--------|--------|-------|--------|--------|-------|
| Charge (e)   | 0.522 | -0.347 | 0.263 | 0.291 | -0.075 | -0.260 | 0.293 | -0.209 | -0.164 | 0.071 |

  

| Atomic Types | H2    | H3    | H4    | H5    | N1     | N2    | O1     | O2     | O3     |
|--------------|-------|-------|-------|-------|--------|-------|--------|--------|--------|
| Charge (e)   | 0.371 | 0.143 | 0.121 | 0.171 | -0.388 | 0.721 | -0.559 | -0.449 | -0.449 |



#### Section S-4 Simulated water adsorption snapshots in the COFs

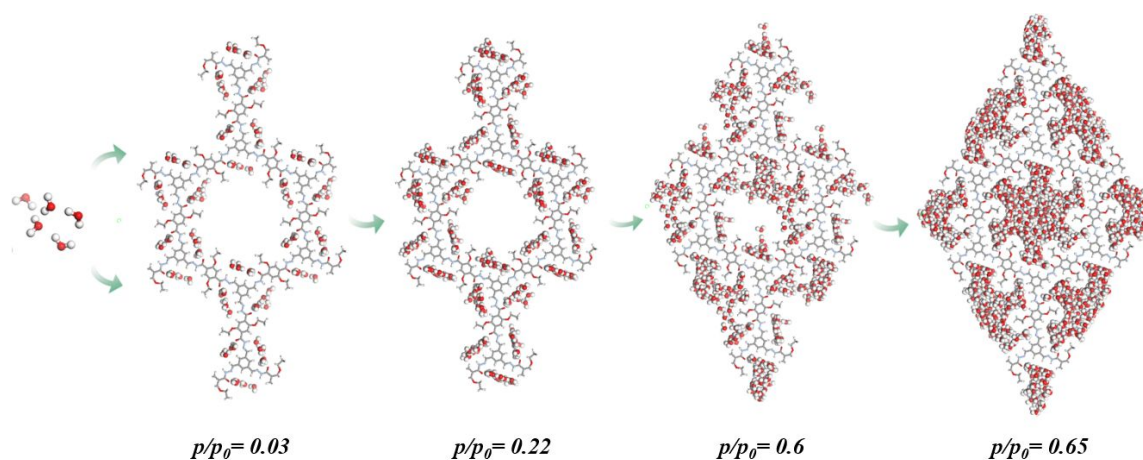

**Figure S4.** Snapshots of water molecules adsorbed in COF-42 as a function of pressure at 298 K.

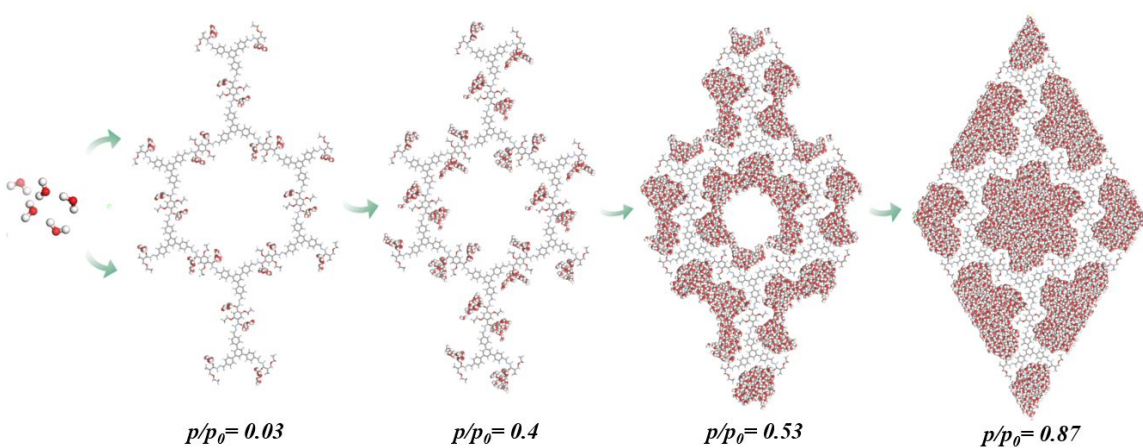

**Figure S5.** Snapshots of water molecules adsorbed in COF-43 as a function of pressure at 298 K.

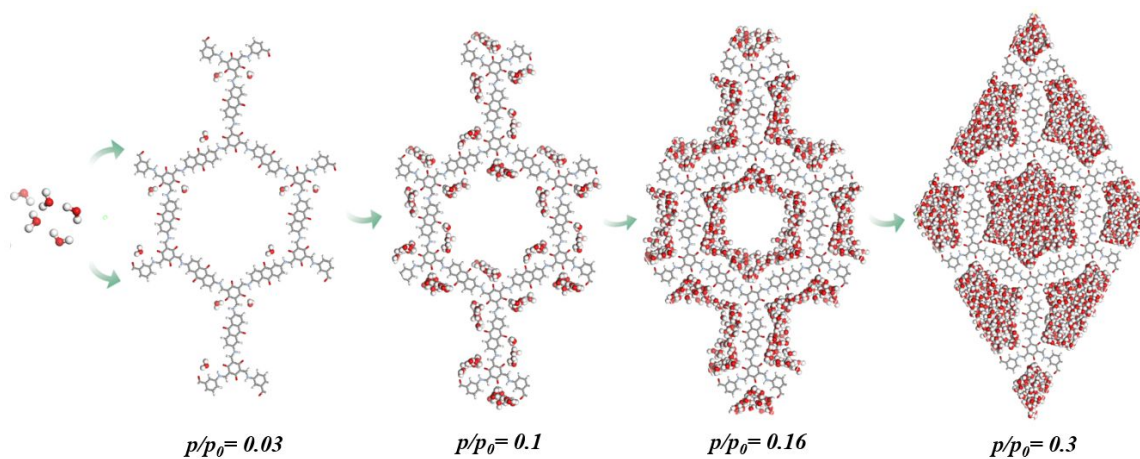

**Figure S6.** Snapshots of water molecules adsorbed in DAAQ-TFP as a function of pressure at 298 K.

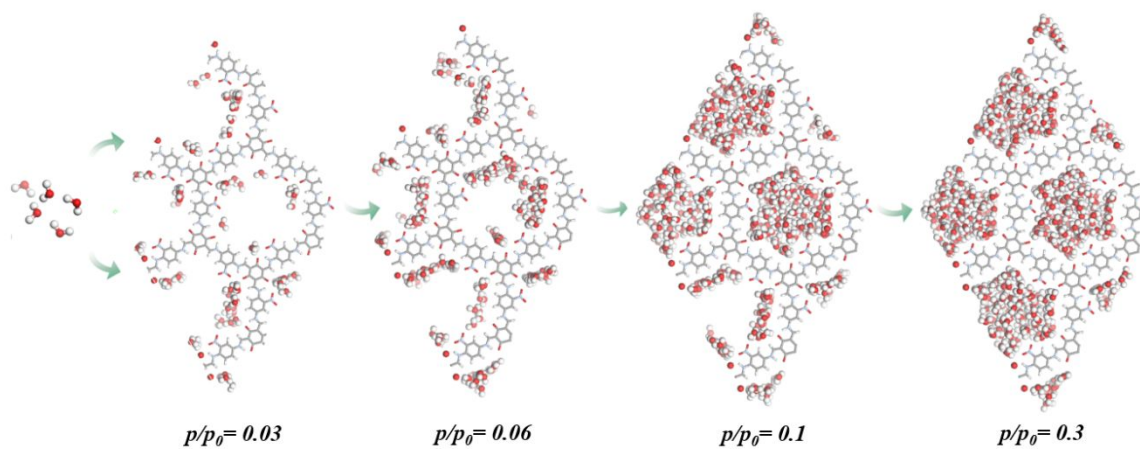

**Figure S7.** Snapshots of water molecules adsorbed in TpPa-NO<sub>2</sub> as a function of pressure at 298 K.

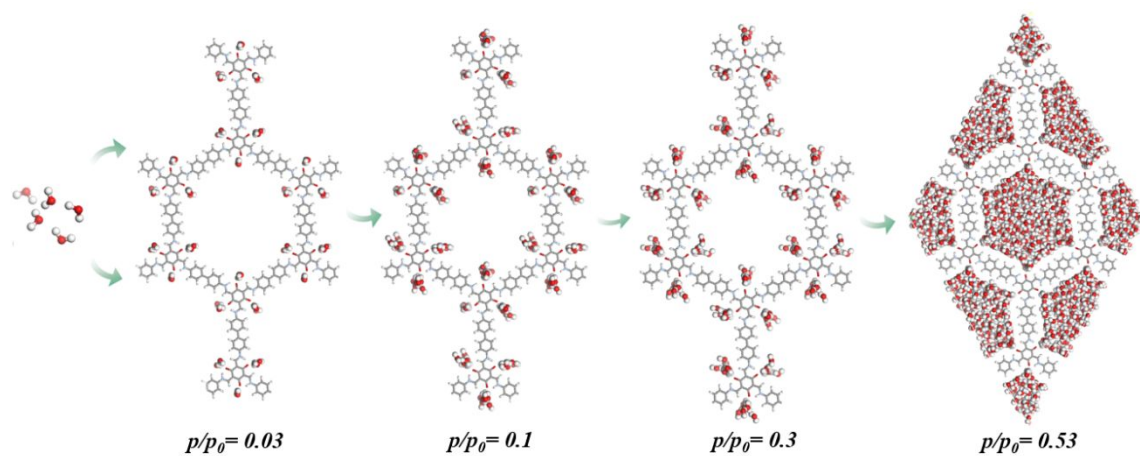

**Figure S8.** Snapshots of water molecules adsorbed in TpBD as a function of pressure at 298 K.

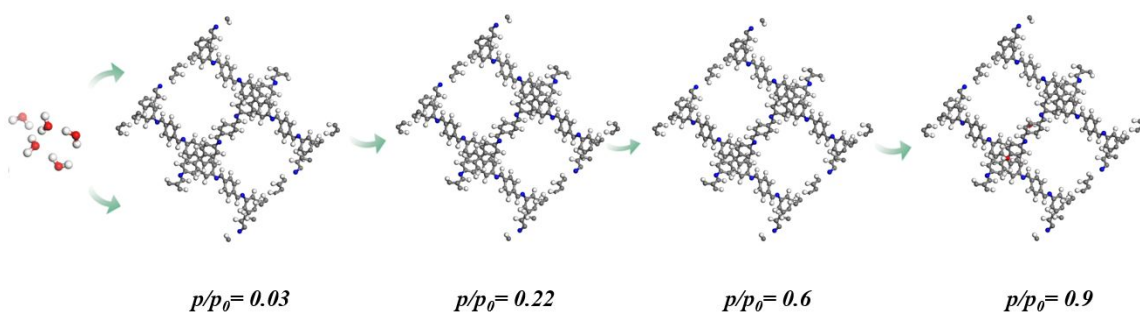

**Figure S9.** Snapshots of water molecules adsorbed in COF-300 as a function of pressure at 298 K.

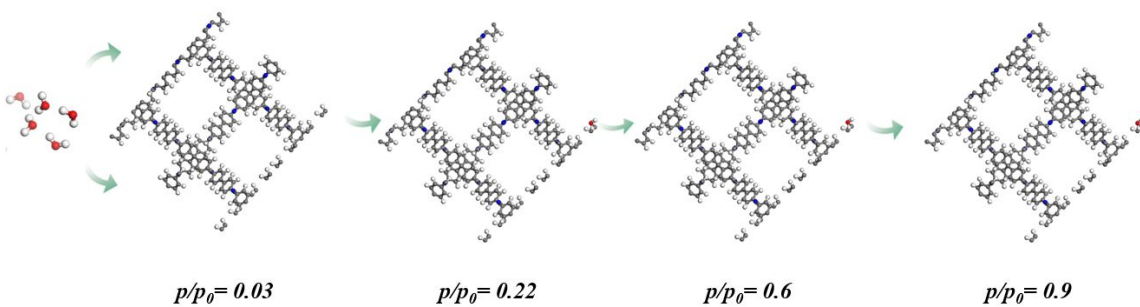

**Figure S10.** Snapshots of water molecules adsorbed in COF-320 as a function of pressure at 298 K.

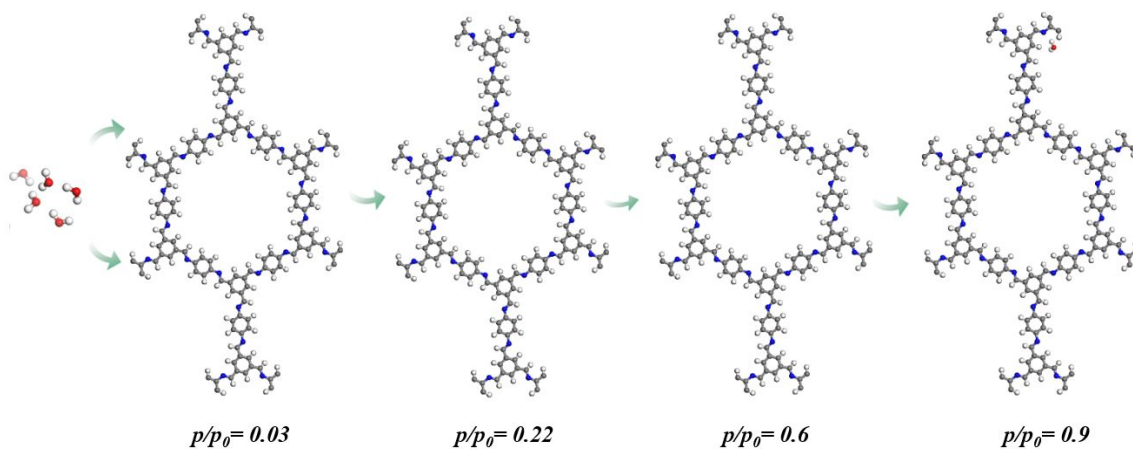

**Figure S11.** Snapshots of water molecules adsorbed in COF-LZU1 as a function of pressure at 298 K.

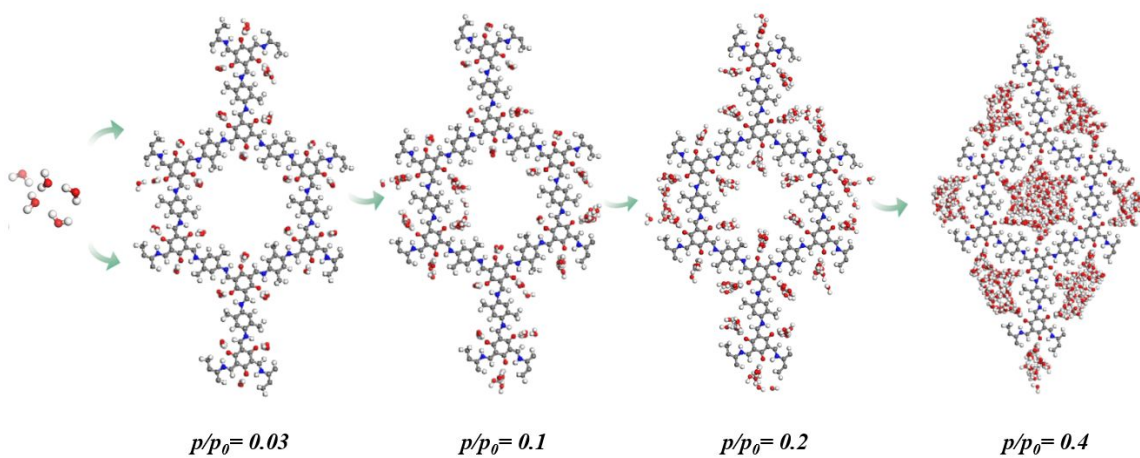

**Figure S12.** Snapshots of water molecules adsorbed in TpPa-2 as a function of pressure at 298 K.



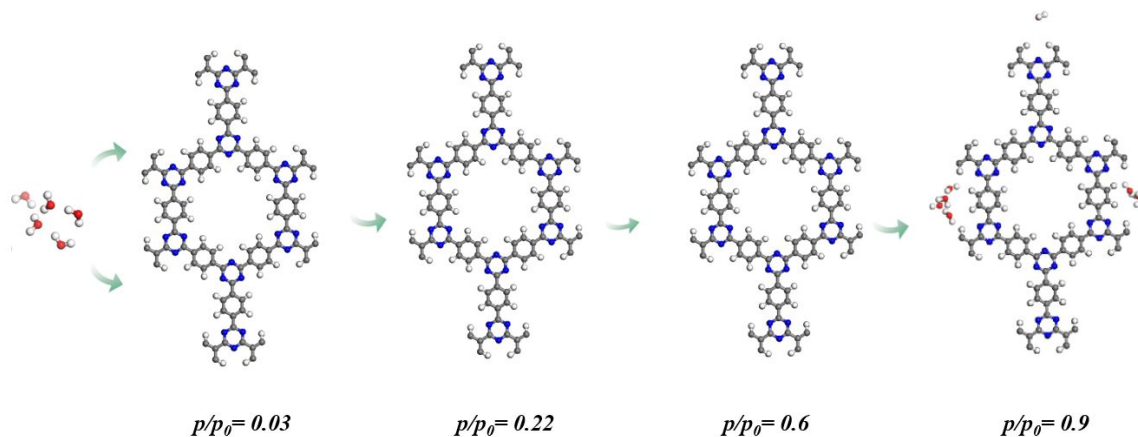

**Figure S13.** Snapshots of water molecules adsorbed in CTF-1 as a function of pressure at 298 K.

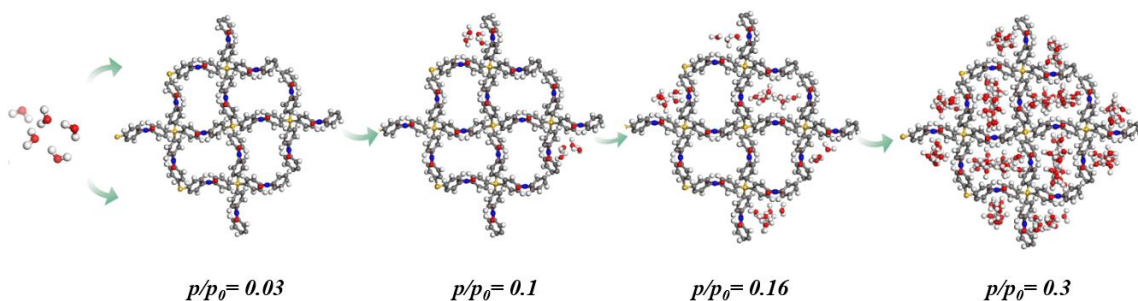

**Figure S14.** Snapshots of water molecules adsorbed in NPN-2 as a function of pressure at 298 K.

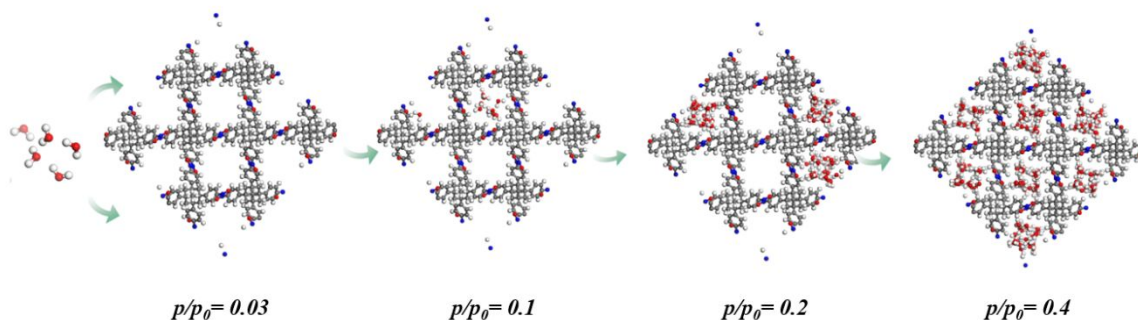

**Figure S15.** Snapshots of water molecules adsorbed in NPN-3 as a function of pressure at 298 K.

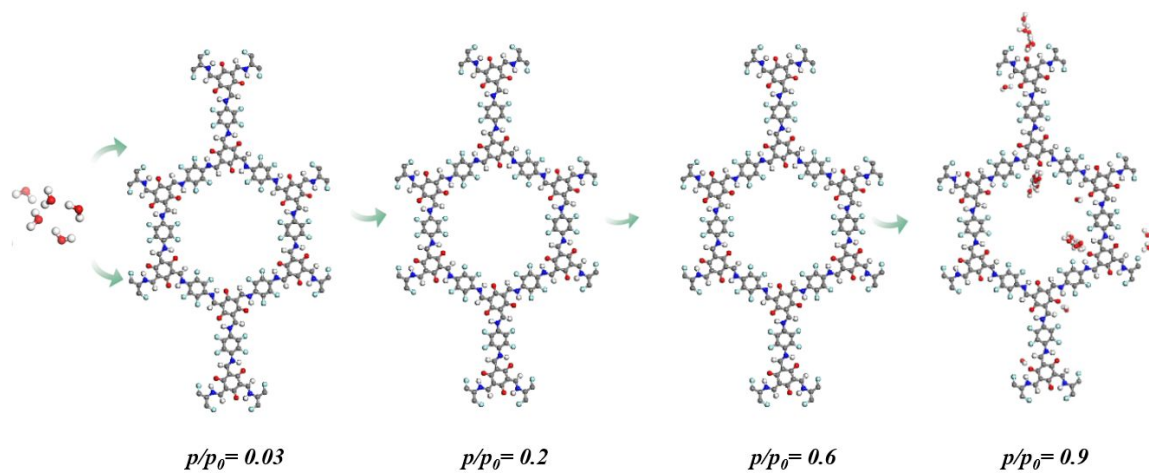

**Figure S16.** Snapshots of water molecules adsorbed in TpPa-F4 as a function of pressure at 298 K.

## Section S-5 Simulated water and CO<sub>2</sub> adsorption density plots in the COFs.

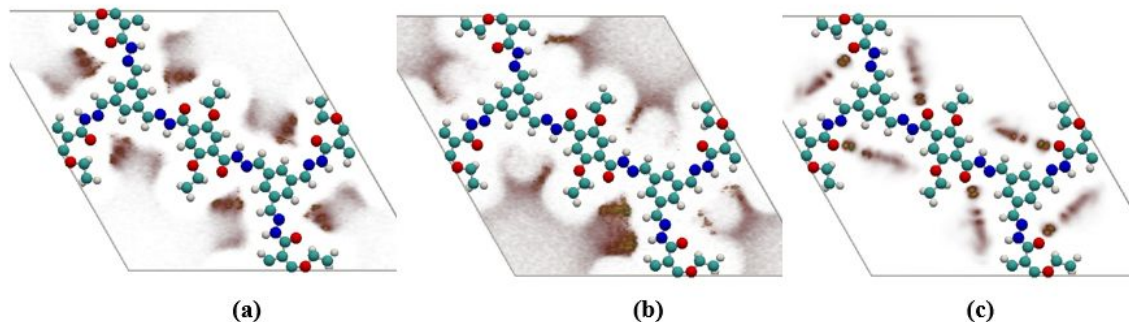

**Figure S17.** The simulated adsorption density plots of CO<sub>2</sub> (a) adsorption in CO<sub>2</sub>/N<sub>2</sub> mixture (15:85) with RH = 0, CO<sub>2</sub> (b) and water (c) adsorption in CO<sub>2</sub>/N<sub>2</sub> mixture (15:85) with RH = 0.1 in COF-42 at 298 K and 1 bar. (Color code: N, blue; O, red; C, green; H, white.)

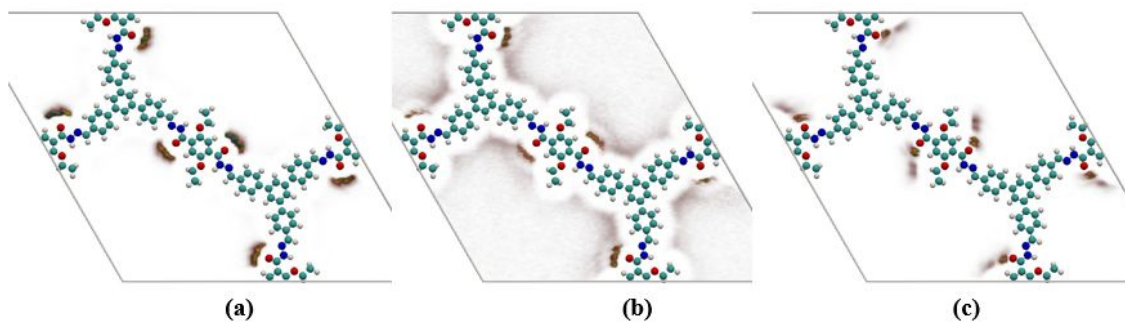

**Figure S18.** The simulated adsorption density plots of CO<sub>2</sub> (a) adsorption in CO<sub>2</sub>/N<sub>2</sub> mixture (15:85) with RH = 0, CO<sub>2</sub> (b) and water (c) adsorption in CO<sub>2</sub>/N<sub>2</sub> mixture (15:85) with RH = 0.1 in COF-43 at 298 K and 1 bar. (Color code: N, blue; O, red; C, green; H, white.)

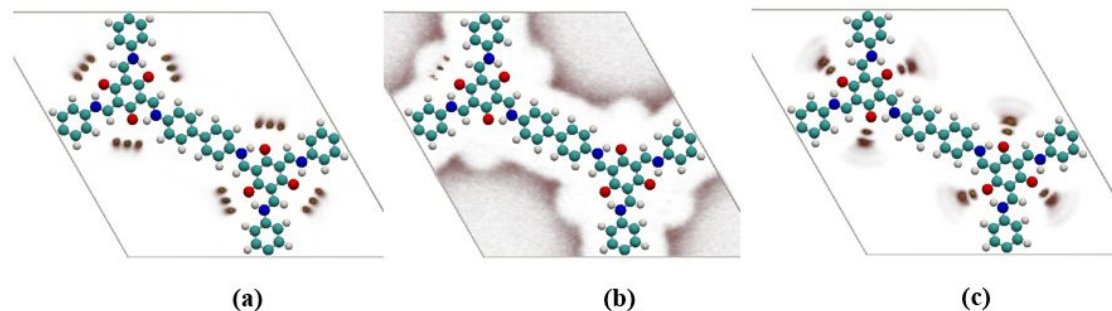

**Figure S19.** The simulated adsorption density plots of CO<sub>2</sub> (a) adsorption in CO<sub>2</sub>/N<sub>2</sub> mixture (15:85) with RH = 0, CO<sub>2</sub> (b) and water (c) adsorption in CO<sub>2</sub>/N<sub>2</sub> mixture (15:85) with RH = 0.1 in TpBD at 298 K and 1 bar. (Color code: N, blue; O, red; C, green; H, white.)

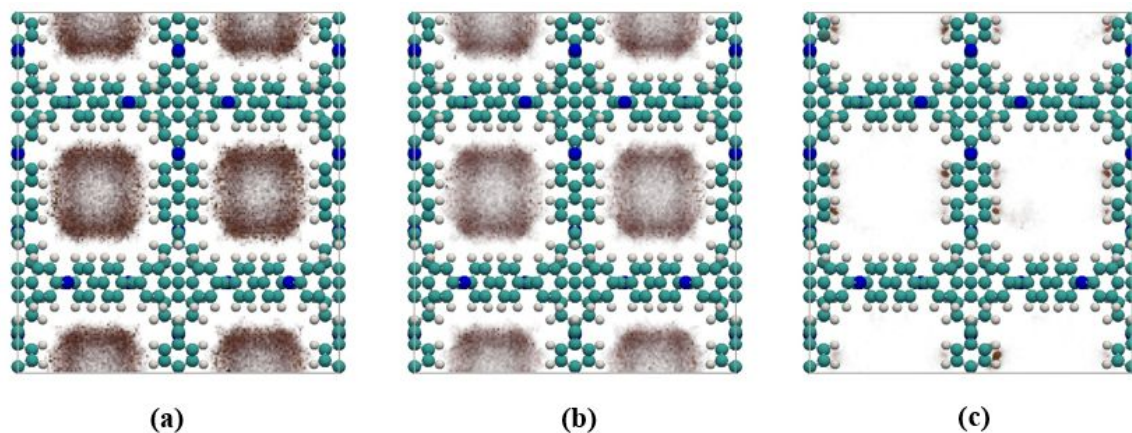

**Figure S20.** The simulated adsorption density plots of CO<sub>2</sub> (a) adsorption in CO<sub>2</sub>/N<sub>2</sub> mixture (15:85) with RH = 0, CO<sub>2</sub> (b) and water (c) adsorption in CO<sub>2</sub>/N<sub>2</sub> mixture (15:85) with RH = 0.1 in COF-320 at 298 K and 1 bar. (Color code: N, blue; O, red; C, green; H, white.)

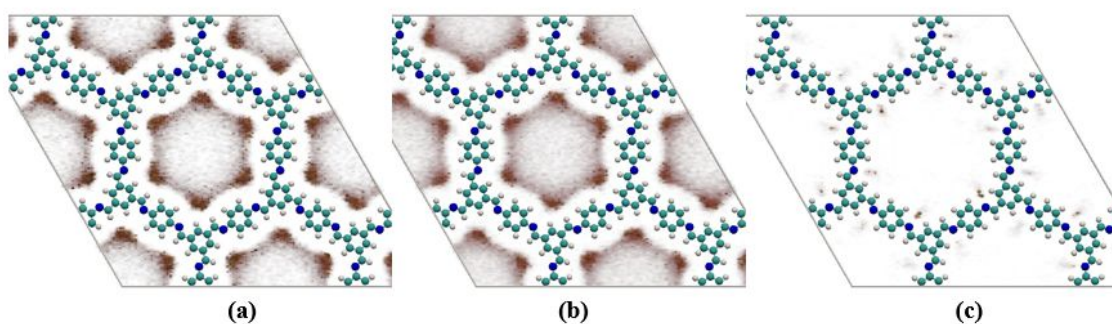

**Figure S21.** The simulated adsorption density plots of CO<sub>2</sub> (a) adsorption in CO<sub>2</sub>/N<sub>2</sub> mixture (15:85) with RH = 0, CO<sub>2</sub> (b) and water (c) adsorption in CO<sub>2</sub>/N<sub>2</sub> mixture (15:85) with RH = 0.1 in COF-LZU1 at 298 K and 1 bar. (Color code: N, blue; O, red; C, green; H, white.)

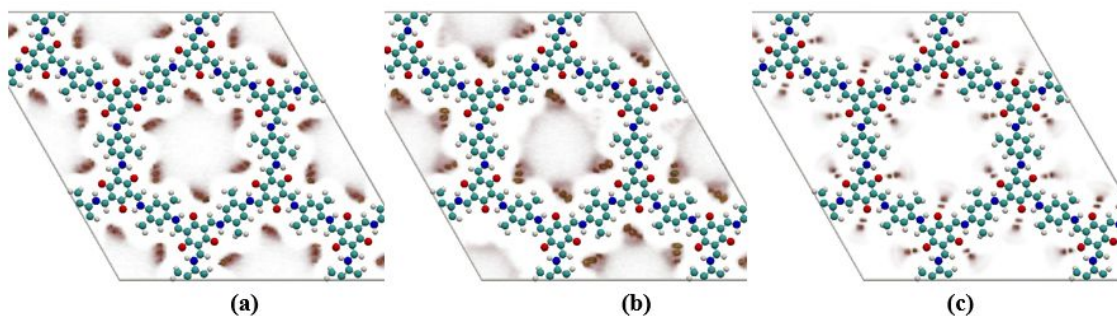

**Figure S22.** The simulated adsorption density plots of CO<sub>2</sub> (a) adsorption in CO<sub>2</sub>/N<sub>2</sub> mixture (15:85) with RH = 0, CO<sub>2</sub> (b) and water (c) adsorption in CO<sub>2</sub>/N<sub>2</sub> mixture (15:85) with RH = 0.1 in TpPa-2 at 298 K and 1 bar. (Color code: N, blue; O, red; C, green; H, white.)



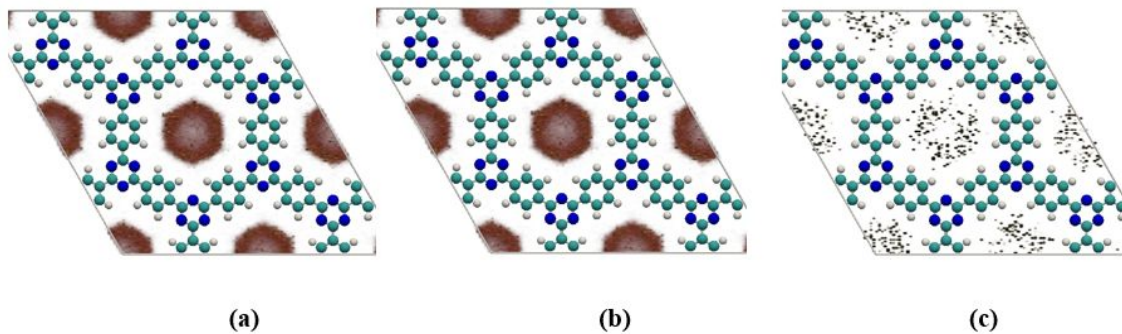

**Figure S23.** The simulated adsorption density plots of CO<sub>2</sub> (a) adsorption in CO<sub>2</sub>/N<sub>2</sub> mixture (15:85) with RH = 0, CO<sub>2</sub> (b) and water (c) adsorption in CO<sub>2</sub>/N<sub>2</sub> mixture (15:85) with RH = 0.1 in CTF-1 at 298 K and 1 bar. (Color code: N, blue; O, red; C, green; H, white.)

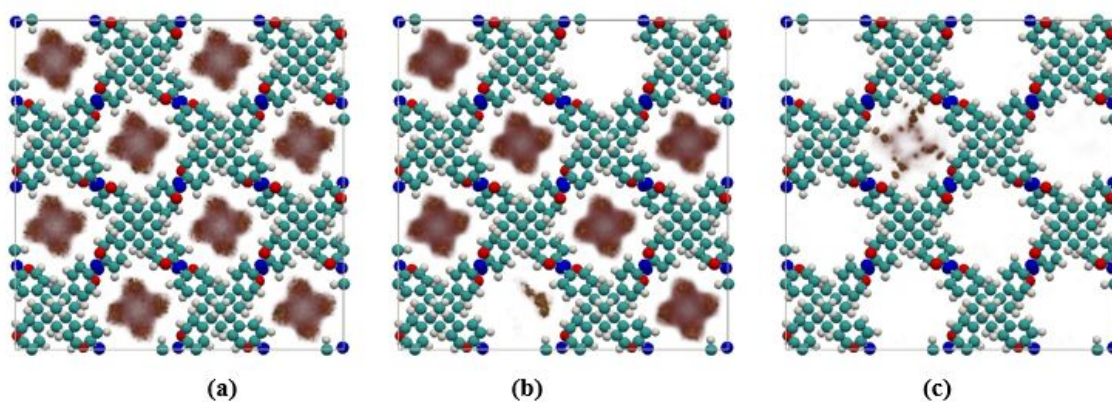

**Figure S24.** The simulated adsorption density plots of CO<sub>2</sub> (a) adsorption in CO<sub>2</sub>/N<sub>2</sub> mixture (15:85) with RH = 0, CO<sub>2</sub> (b) and water (c) adsorption in CO<sub>2</sub>/N<sub>2</sub> mixture (15:85) with RH = 0.1 in NPN-3 at 298 K and 1 bar. (Color code: N, blue; O, red; C, green; H, white.)

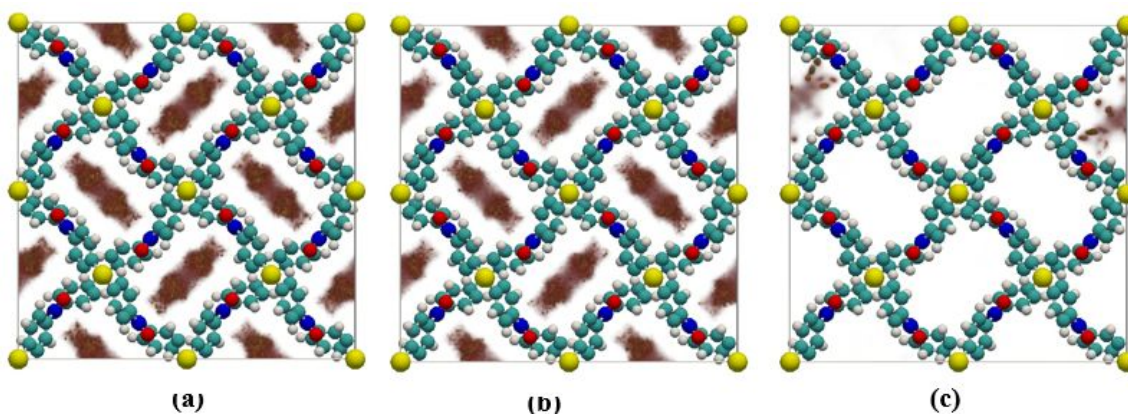

**Figure S25.** The simulated adsorption density plots of CO<sub>2</sub> **(a)** adsorption in CO<sub>2</sub>/N<sub>2</sub> mixture (15:85) with RH = 0, CO<sub>2</sub> **(b)** and water **(c)** adsorption in CO<sub>2</sub>/N<sub>2</sub> mixture (15:85) with RH = 0.1 in NPN-2 at 298 K and 1 bar. (Color code: N, blue; O, red; C, green; H, white.)

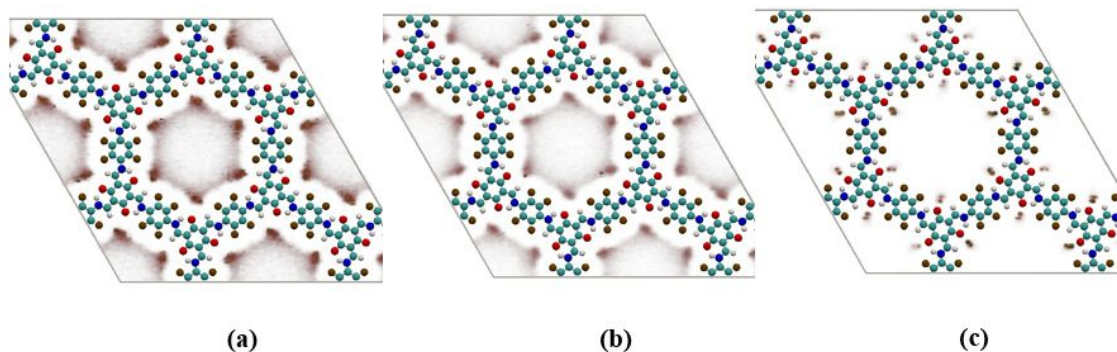

**Figure S26.** The simulated adsorption density plots of CO<sub>2</sub> **(a)** adsorption in CO<sub>2</sub>/N<sub>2</sub> mixture (15:85) with RH = 0, CO<sub>2</sub> **(b)** and water **(c)** adsorption in CO<sub>2</sub>/N<sub>2</sub> mixture (15:85) with RH = 0.1 in TpPa-F4 at 298 K and 1 bar. (Color code: N, blue; O, red; C, green; H, white.)

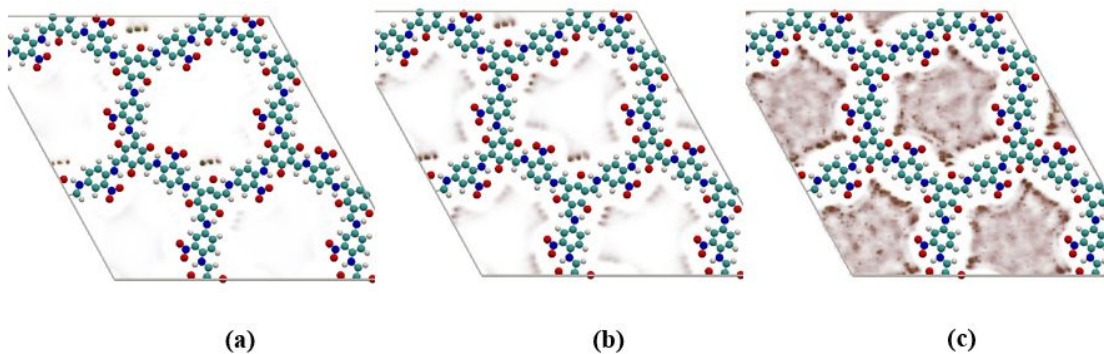

**Figure S27.** The simulated adsorption density plots of CO<sub>2</sub> **(a)** adsorption in CO<sub>2</sub>/N<sub>2</sub> mixture (15:85) with RH = 0, CO<sub>2</sub> **(b)** and water **(c)** adsorption in CO<sub>2</sub>/N<sub>2</sub> mixture (15:85) with RH = 0.1 in TpPa-NO<sub>2</sub> at 298 K and 1 bar. (Color code: N, blue; O, red; C, green; H, white.)

## Section S-6 Pore Size Distributions of the COFs

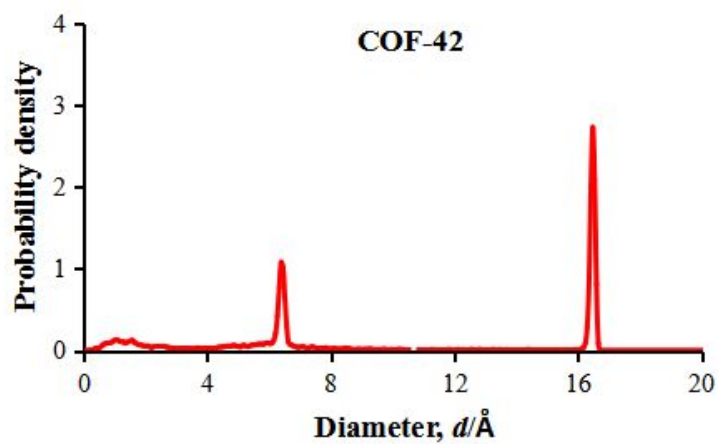

**Figure S28.** Pore Size distribution for COF-42.

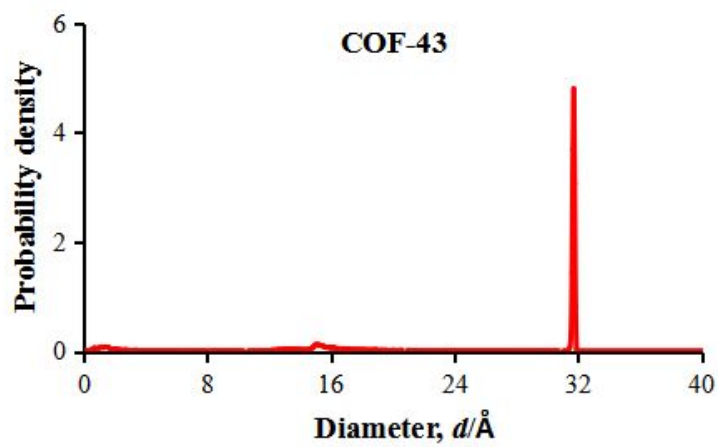

**Figure S29.** Pore Size distribution for COF-43.

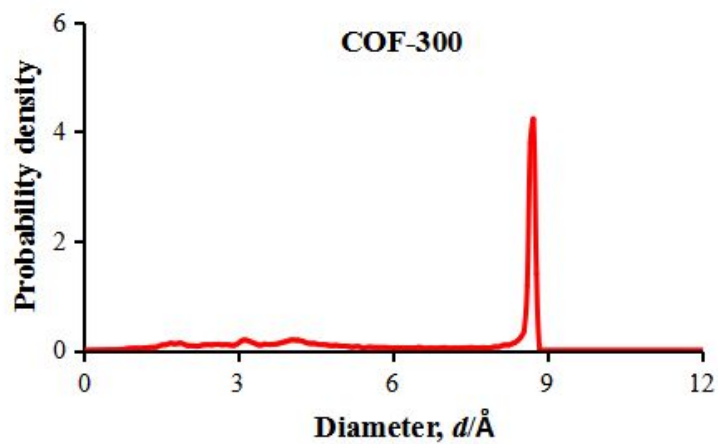

**Figure S30.** Pore Size distribution for COF-300.

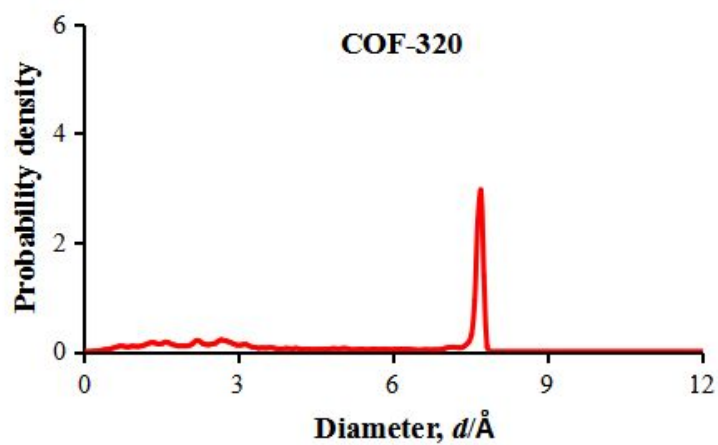

**Figure S31.** Pore Size distribution for COF-320.

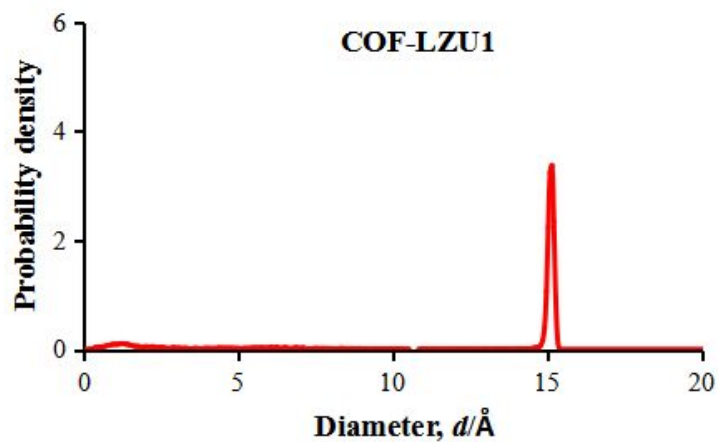

**Figure S32.** Pore Size distribution for COF-LZU1.

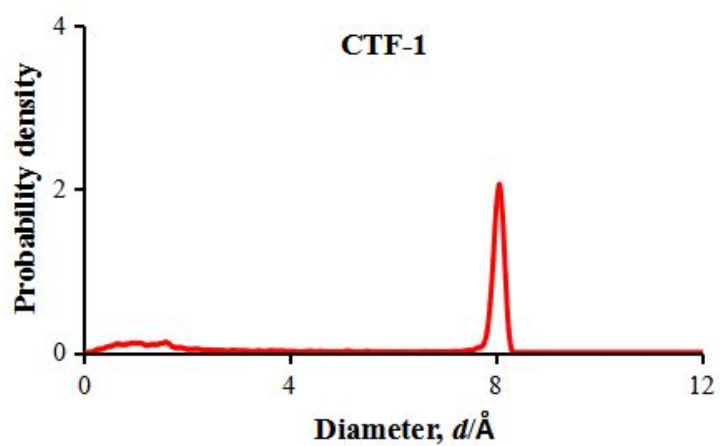

**Figure S33.** Pore Size distribution for CTF-1.

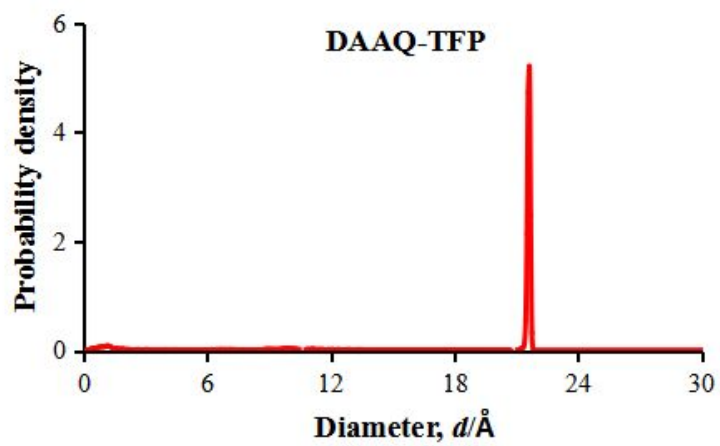

**Figure S34.** Pore Size distribution for DAAQ-TFP.

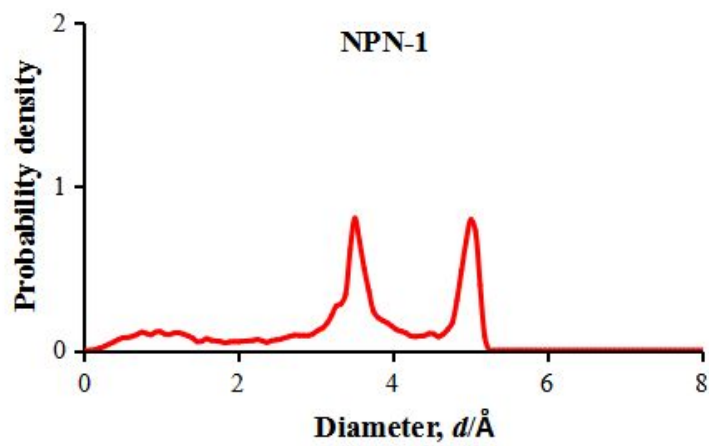

**Figure S35.** Pore Size distribution for NPN-1.

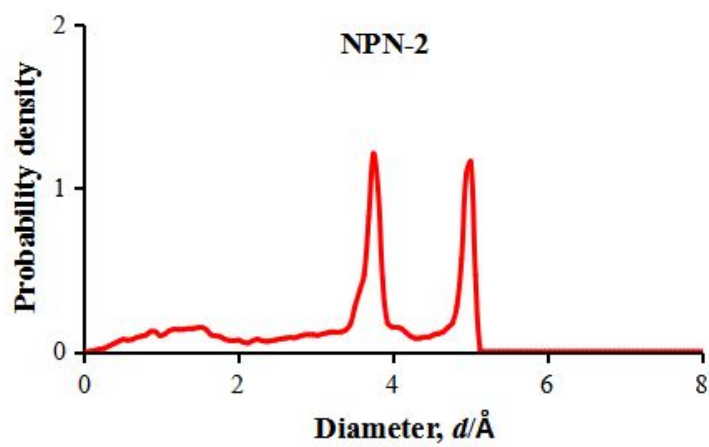

**Figure S36.** Pore Size distribution for NPN-2.



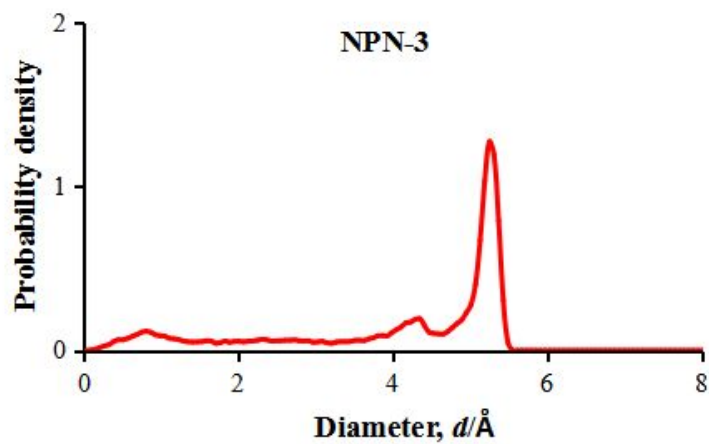

**Figure S37.** Pore Size distribution for NPN-3.

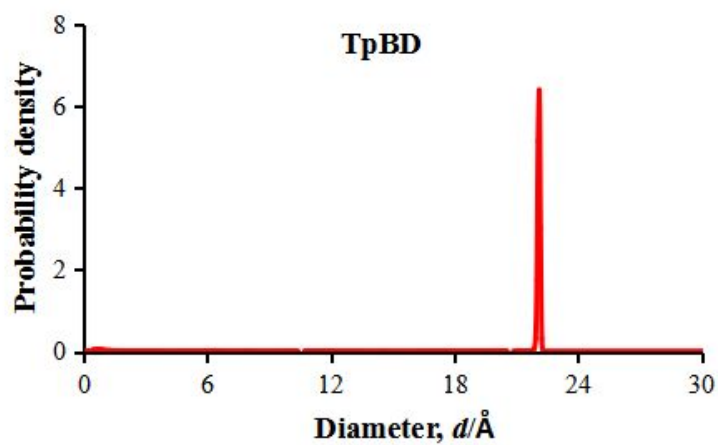

**Figure S38.** Pore Size distribution for TpBD.

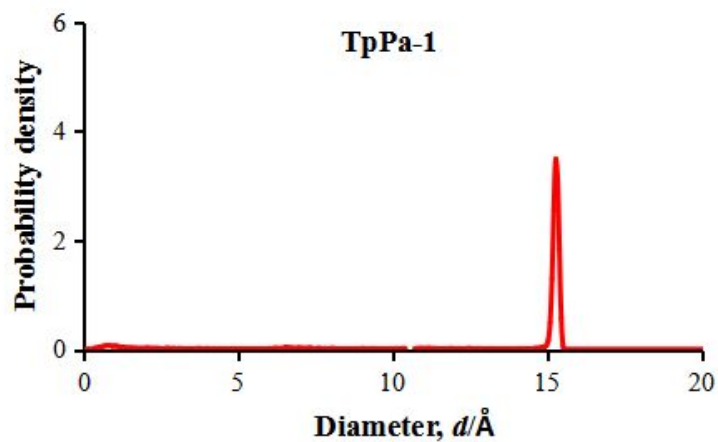

**Figure S39.** Pore Size distribution for TpPa-1.

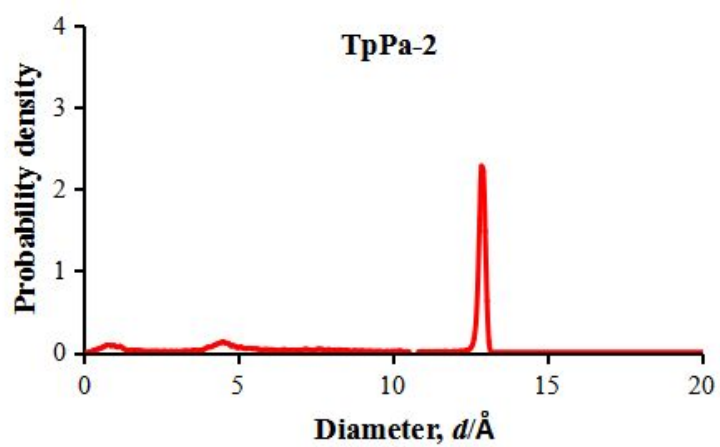

**Figure S40.** Pore Size distribution for TpPa-2.

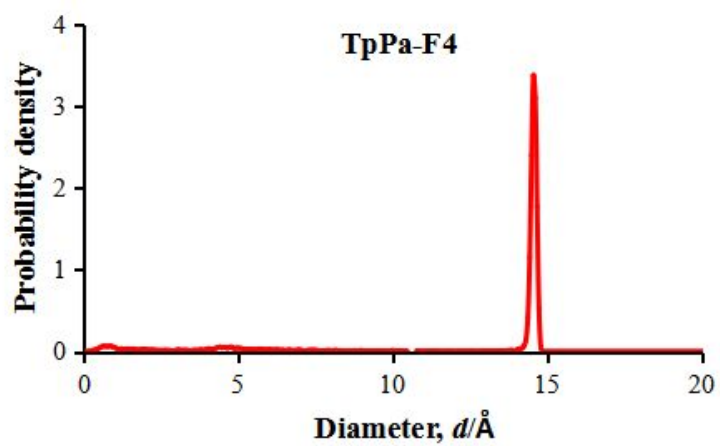

**Figure S41.** Pore Size distribution for TpPa-F4.



**Section S-7 Radial distribution functions (RDF) of the oxygen-oxygen distance between oxygen atoms of the water molecules and the COF framework oxygen atoms**

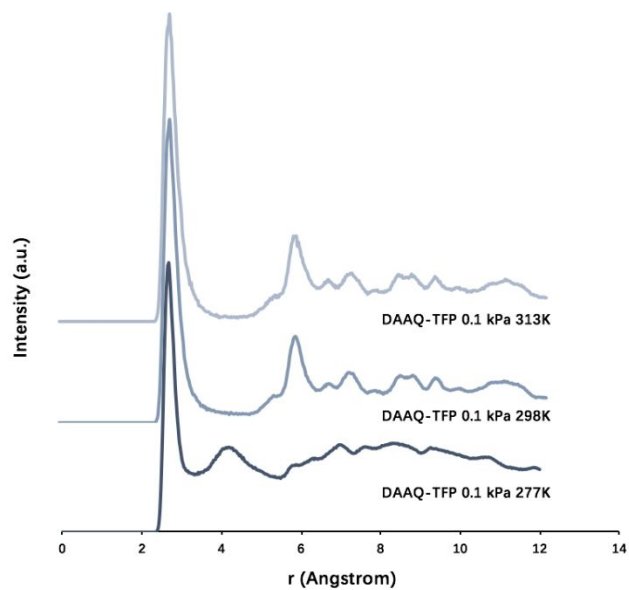

**Figure S42.** Radial distribution function (RDF) of the oxygen-oxygen distance between oxygen atom of the adsorbed water molecules and the COF framework oxygen atoms in DAAQ-TFP at different temperatures and 0.1 kPa.

## Section S-8 Force field parameters used in the GCMC simulations

**Table S5.** Lennard-Jones parameters for the framework atoms of the COFs.

| Atoms                | C     | O     | H     | N     | F     | Si    |
|----------------------|-------|-------|-------|-------|-------|-------|
| $\sigma(\text{\AA})$ | 3.47  | 3.03  | 2.85  | 3.26  | 3.09  | 3.80  |
| $\varepsilon/k_B$    | 47.86 | 48.16 | 7.650 | 38.95 | 156.0 | 10.53 |

$\varepsilon$  is the well depth,  $\sigma$  is the diameter. The LJ interaction parameters are from DREIDING force field.

**Table S6.** Force-Field parameters and geometries of six water models considered in this study

| Model    | Sites | $\sigma$ (Å) | $\iota_1$ (Å) | $\iota_2$ (Å) | $q_1$ (e) | $q_2$ (e) | $\theta$ (°) | $\varphi$ (°) |
|----------|-------|--------------|---------------|---------------|-----------|-----------|--------------|---------------|
| SPC      | Three | 3.1656       | 1.000         | -             | +0.4100   | -0.8200   | 109.47       | -             |
| SPC/E    | Three | 3.1656       | 1.000         | -             | +0.4238   | -0.8476   | 109.47       | -             |
| TIP4P    | Four  | 3.1540       | 0.957         | 0.150         | +0.5200   | -1.0400   | 104.52       | 52.26         |
| TIP4P_Ew | Four  | 3.1643       | 0.957         | 0.125         | +0.5242   | -1.0484   | 104.52       | 52.26         |
| TIP5P    | Five  | 3.1200       | 0.957         | 0.700         | +0.2410   | -0.2410   | 104.52       | 109.47        |
| TIP5P_Ew | Five  | 3.0970       | 0.957         | 0.700         | +0.2410   | -0.2410   | 104.52       | 109.47        |

## References

- (1) Chandra, S.; Kandambeth, S.; Biswal, B. P.; Lukose, B.; Kunjir, S. M.; Chaudhary, M.; Babarao, R.; Heine, T.; Banerjee, R. Chemically Stable Multilayered Covalent Organic Nanosheets from Covalent Organic Frameworks via Mechanical Delamination. *J. Am. Chem. Soc.* **2013**, *135*, 17853-17861.
- (2) Zhang, Y.; Su, J.; Furukawa, H.; Yun, Y.; Gá, F. Single-Crystal Structure of a Covalent Organic Framework. *J. Am. Chem. Soc.* **2013**, 7–10.
- (3) Furukawa, H.; Yaghi, O. M. Storage of Hydrogen, Methane, and Carbon Dioxide in Highly Porous Covalent Organic Frameworks for Clean Energy Applications. *J. Am. Chem. Soc.* **2009**, *131*, 8875-8883.
- (4) Nagai, A.; Guo, Z.; Feng, X.; Jin, S.; Chen, X.; Ding, X.; Jiang, D. Pore Surface Engineering in Covalent Organic Frameworks. *Nat. Commun.* **2011**, *2*, 536.
- (5) Uribe-Romo, F. J.; Doonan, C. J.; Furukawa, H.; Oisaki, K.; Yaghi, O. M. Crystalline Covalent Organic Frameworks with Hydrazone Linkages: Journal of the American Chemical Society. *J. Am. Chem. Soc.* **2011**, *133*, 11478–11481.
- (6) Uribe-romo, F. J.; Hunt, J. R.; Furukawa, H.; Klotz, C.; Keeffe, M. O.; Yaghi, O. M. Communication A Crystalline Imine-Linked 3-D Porous Covalent Organic Framework A Crystalline Imine-Linked 3-D Porous Covalent Organic Framework. *J. Am. Chem. Soc.* **2009**, *131*, 4570–4571.
- (7) Ding, S.-Y.; Gao, J.; Wang, Q.; Zhang, Y.; Song, W.-G.; Su, C.-Y.; Wang, W. Construction of Covalent Organic Framework for Catalysis: Pd/COF-LZU1 in Suzuki-Miyaura Coupling Reaction. *J. Am. Chem. Soc.* **2011**, *133*, 19816–19822.
- (8) Kandambeth, S.; Mallick, A.; Lukose, B.; Mane, M. V.; Heine, T.; Banerjee, R. Construction of Crystalline 2D Covalent Organic Frameworks with Remarkable Chemical (Acid/Base) Stability via a Combined Reversible and Irreversible Route. *J. Am. Chem. Soc.* **2012**, *134*, 19524–19527.
- (9) Tong, M.; Yang, Q.; Zhong, C. Computational Screening of Covalent Organic Frameworks for CH<sub>4</sub>/H<sub>2</sub>, CO<sub>2</sub>/H<sub>2</sub> and CO<sub>2</sub>/CH<sub>4</sub> Separations. *Microporous Mesoporous Mater.* **2015**, *210*, 142–148.
- (10) Biswal, B. P.; Chandra, S.; Kandambeth, S.; Lukose, B.; Heine, T.; Banerjee, R. Mechanochemical

Synthesis of Chemically Stable Isorecticular Covalent Organic Frameworks. *J. Am. Chem. Soc.* **2013**, *135*, 5328–5331.

- (11) Kuhn, P.; Antonietti, M.; Thomas, A. Porous, Covalent Triazine-Based Frameworks Prepared by Ionothermal Synthesis. *Angew. Chemie Int. Ed.* **2008**, *47*, 3450–3453.
- (12) DeBlase, C. R.; Silberstein, K. E.; Truong, T.T.; Abruña, H. D.; Dichtel, W. R.  $\beta$ -Ketoenamine-Linked Covalent Organic Frameworks Capable of Pseudocapacitive Energy Storage. *J. Am. Chem. Soc.* **2013**, *135*, 16821–16824.
- (13) Tong, M.; Yang, Q.; Xiao, Y.; Zhong, C. Revealing the Structure-Property Relationship of Covalent Organic Frameworks for CO<sub>2</sub> Capture from Postcombustion Gas: A Multi-Scale Computational Study. *Phys. Chem. Chem. Phys.* **2014**, *16*, 15189–15198.
